# Supplementary material
Source: PubMed Central journal article supplement (PMC4563752)

**Supplementary Figure 1. Variable frequency of blood V $\delta$ 2T-cells in demographically diverse cohorts of CD patients and healthy controls.** Total number of blood V $\delta$ 2T-cells detected by flow cytometry in a demographically diverse cohort of CD patients with moderately active disease but not receiving immunosuppressive therapy (n=12) compared with healthy control volunteers (n=26). V $\delta$ 2T-cells were gated as CD3+ V $\delta$ 2+ blood lymphocytes and absolute numbers were determined using Flow-Count Fluorospheres added to the cell suspensions immediately prior to acquisition. Groups were compared by T-test.

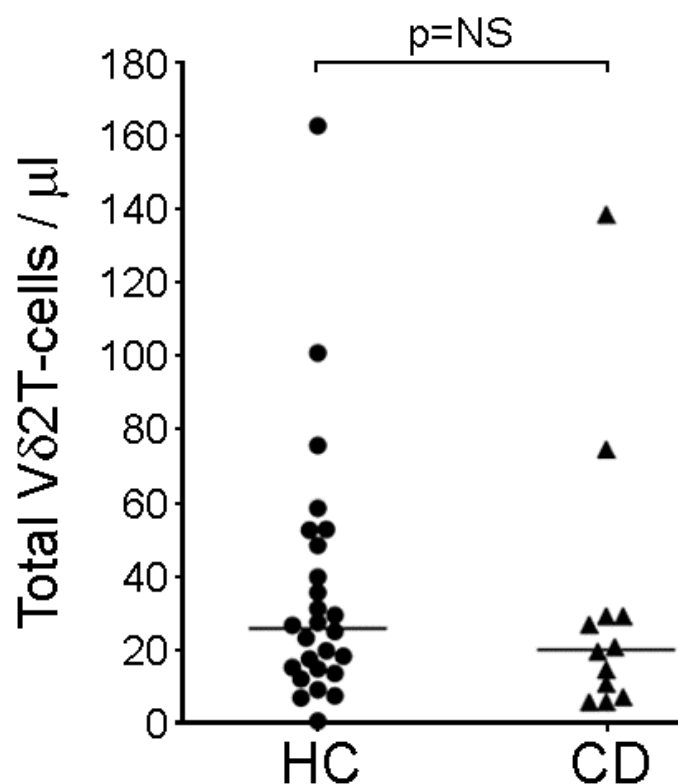

**Supplementary Figure 2. Azathioprine (AZA) partially depletes conventional blood T-cells but ablates the Vδ2+ population.** A subset of data from a previously published study (16) of AZA-treated CD cases (n=5) and healthy controls (n=8) was analyzed to determine the extent to which AZA depletes different subsets of conventional blood T-cells (CD4+ naïve, CD4+ memory, CD8+ naïve, CD8+ memory). This analysis confirmed that no major population of αβ T-cells in blood was depleted by more than 25% in AZA-treated CD, whereas circulating Vδ2T-cell numbers in the same individuals were reduced by >95% (p=0.002 determined by T-test).

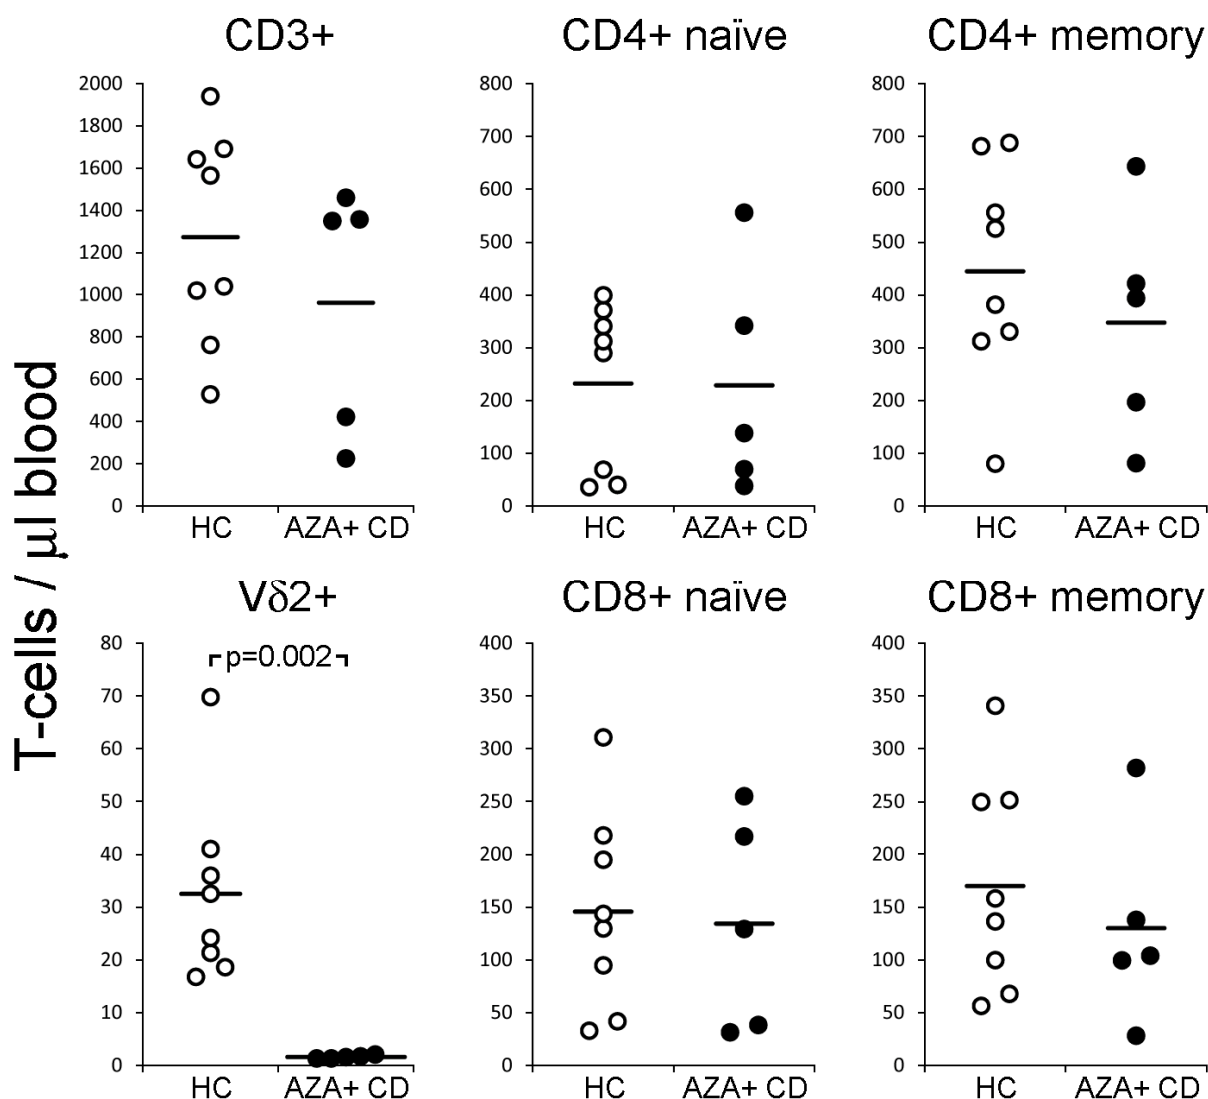

Supplement: JCI80840sd.pdf [file JCI80840sd.pdf]
